## Supporting information

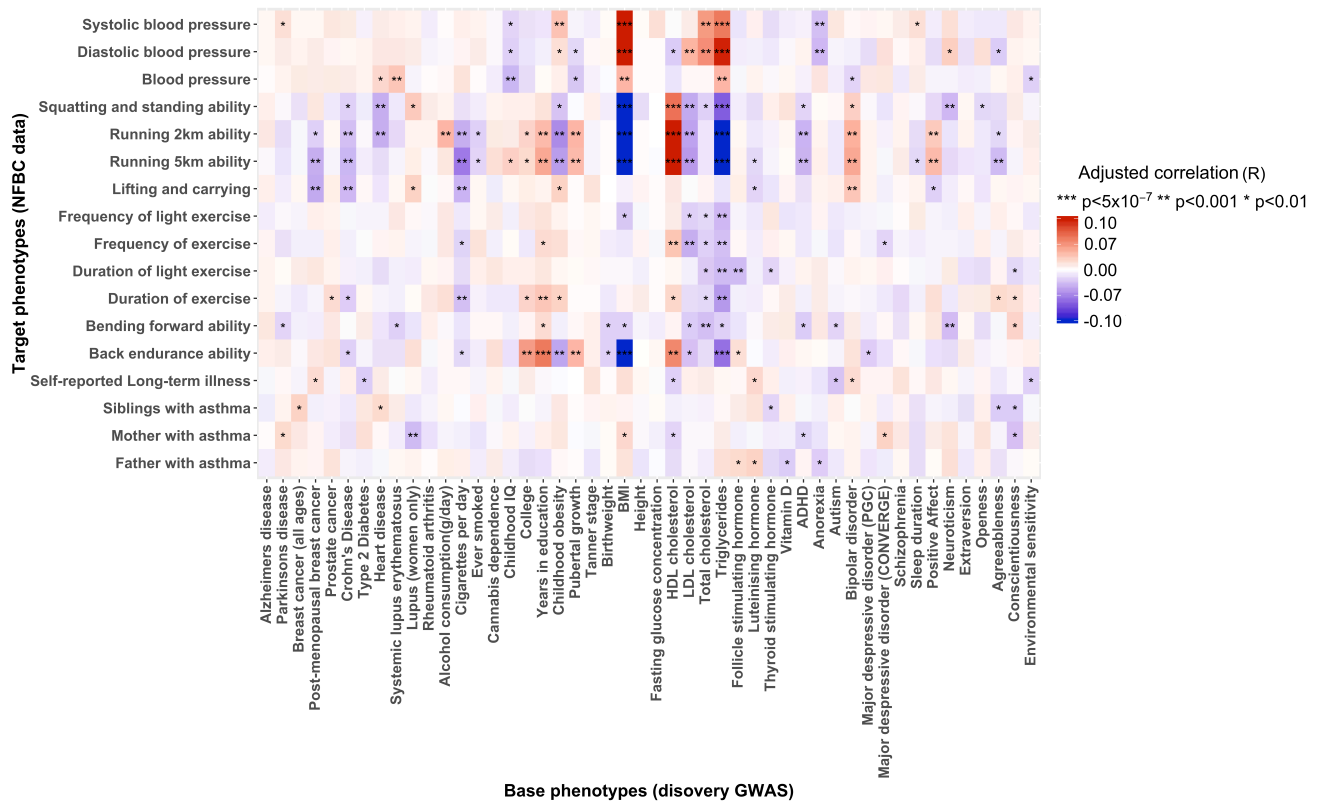

**S1 Fig. Heat map showing genetic associations between polygenic risk scores of GWAS traits (X-axis) and NFBC1966 traits (Y-axis) on self-reports on exercise measures and self and clinical reports on health-related measures. Asterisks denote different levels of evidence according to  $P$ -value: \*\*\* =  $P < 5 \times 10^{-7}$ , \*\* =  $P < 0.001$ , \* =  $P < 0.01$ . Red  $r$  values indicate positive correlations, while blue  $r$  values indicate negative correlations.**

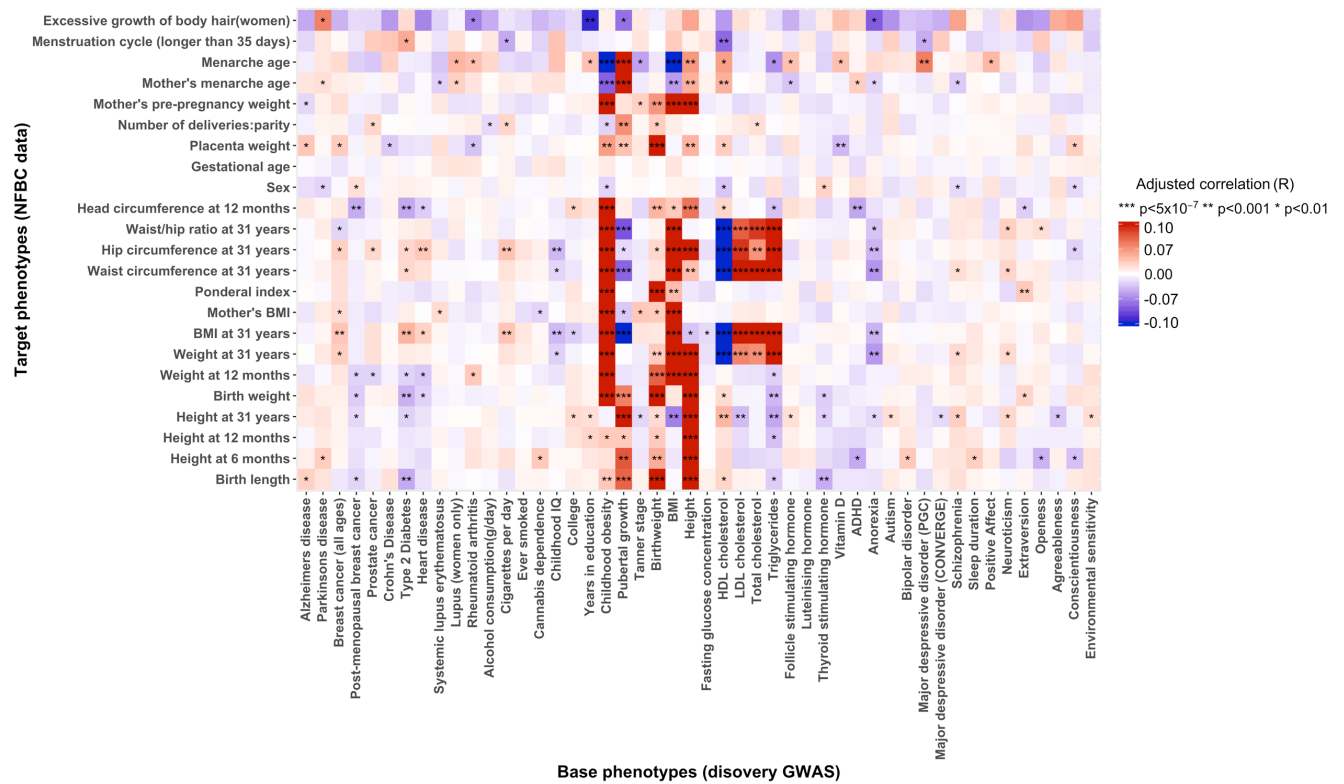

**S2 Fig. Heat map showing genetic associations between polygenic risk scores of GWAS traits (X-axis) and NFB166 traits (Y-axis) on clinically measured anthropometric and physiological traits.** Asterisks denote different levels of evidence according to  $P$ -value: \*\*\* =  $P < 5 \times 10^{-7}$ , \*\* =  $P < 0.001$ , \* =  $P < 0.01$ . Red  $r$  values indicate positive correlations, while blue  $r$  values indicate negative correlations.

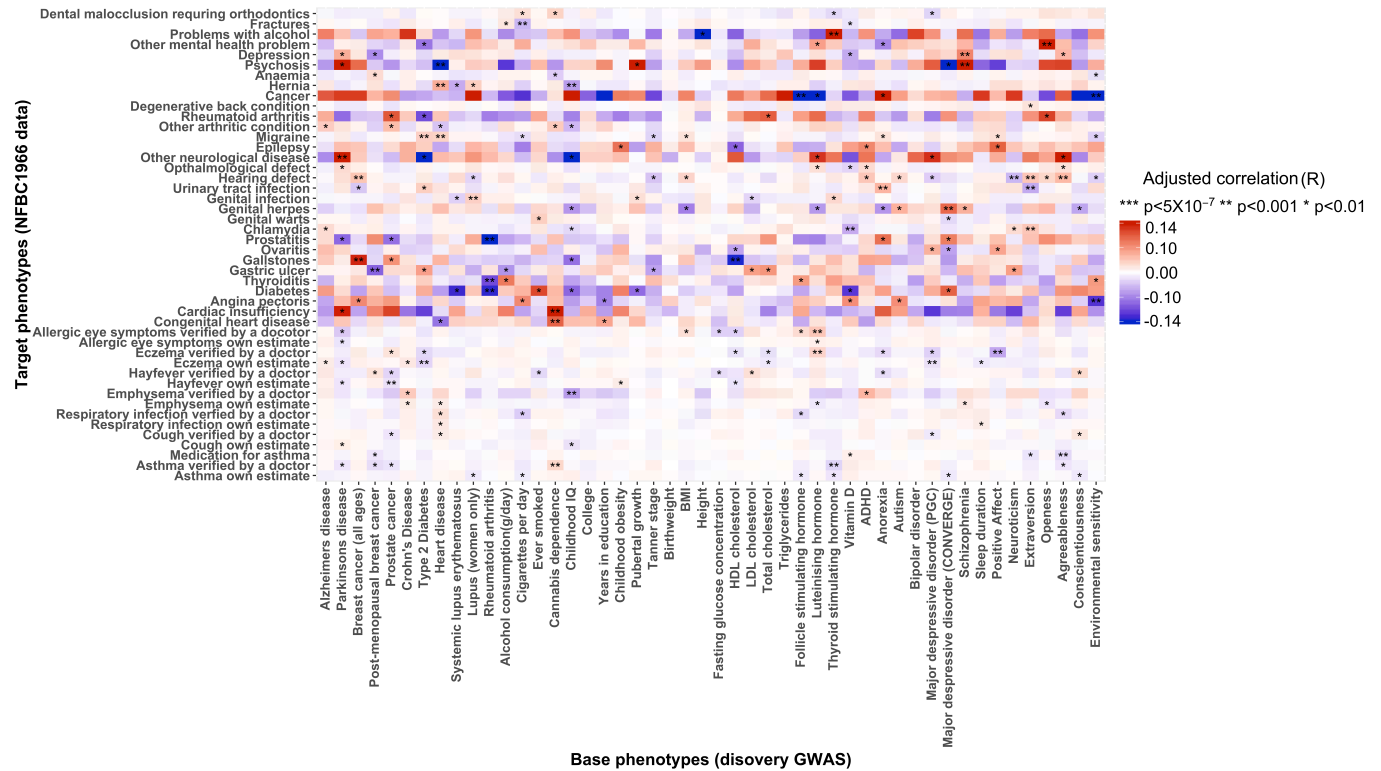

**S3 Fig. Heat map showing genetic associations between polygenic risk scores from GWAS traits (X-axis) and NFB1966 traits (Y-axis) for self-reported disorders, medical and psychiatric conditions verified or treated by a doctor, controlled for sex, BMI and SES. Asterisks denote different levels of evidence according to  $P$ -value: \*\*\* =  $P < 5 \times 10^{-7}$ , \*\* =  $P < 0.001$ , \* =  $P < 0.01$ . Red  $r$  values indicate positive correlations, while blue  $r$  values indicate negative correlations.**

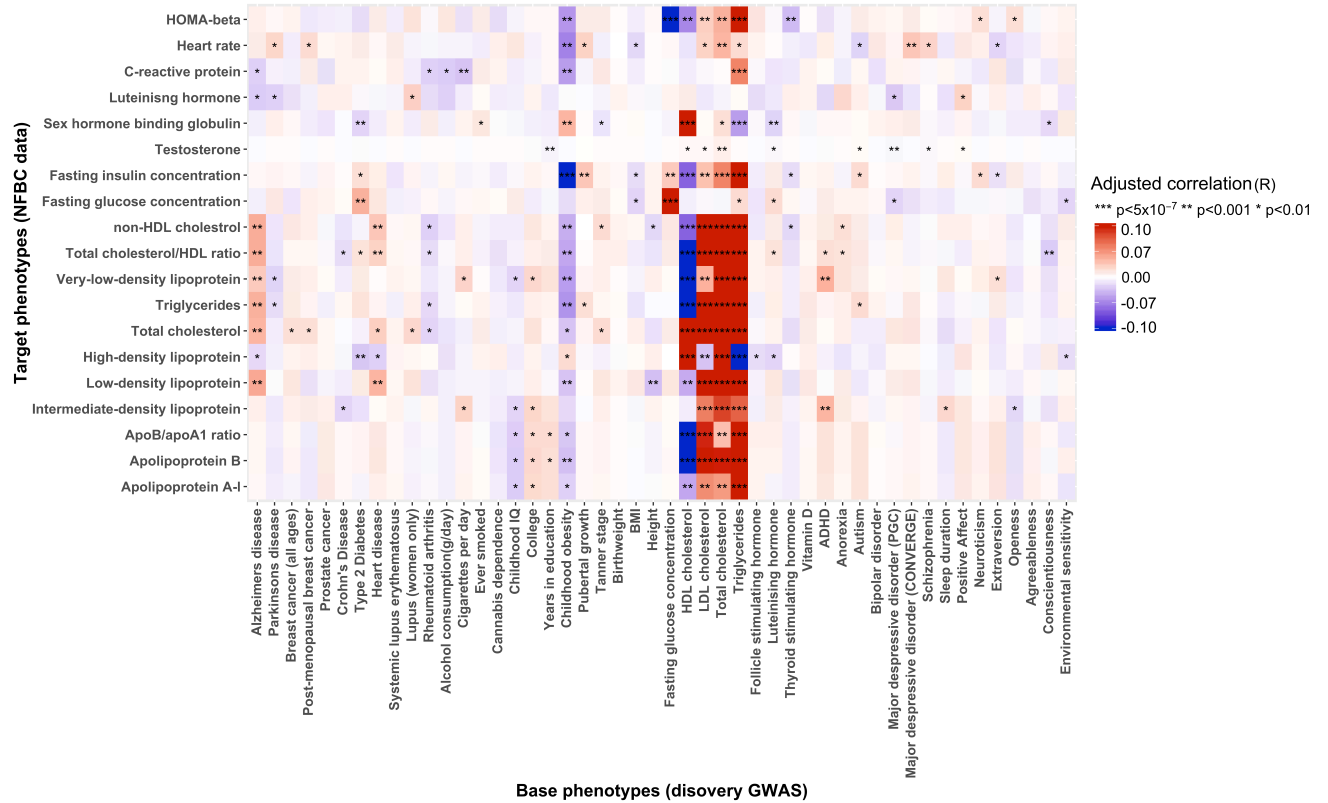

**S4 Fig. Heat map showing genetic associations between polygenic risk scores of GWAS traits (X-axis) and NFB1966 traits (Y-axis) for cardiometabolic measurements from blood samples, controlled for sex, BMI and SES. Asterisks denote different levels of evidence according to  $P$ -value: \*\*\* =  $P < 5 \times 10^{-7}$ , \*\* =  $P < 0.001$ , \* =  $P < 0.01$ . Red  $r$  values indicate positive correlations, while blue  $r$  values indicate negative correlations.**



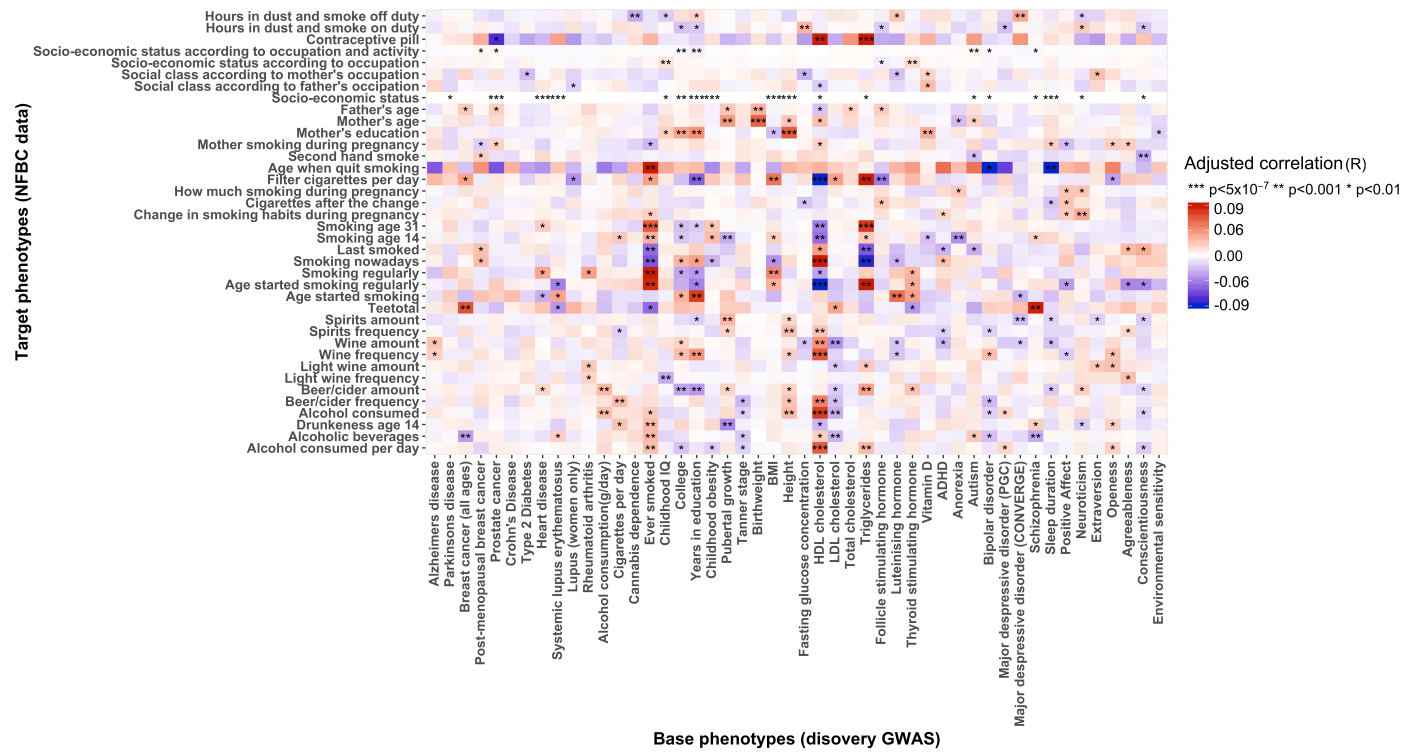

**S5 Fig. Heat map showing genetic associations between polygenic risk scores of GWAS traits (X-axis) and NFB166 traits (Y-axis) from questionnaires on lifestyle and social factors, controlled for sex, BMI and SES. Asterisks denote different levels of evidence according to  $P$ -value: \*\*\* =  $P < 5 \times 10^{-7}$ , \*\* =  $P < 0.001$ , \* =  $P < 0.01$ . Red  $r$  values indicate positive correlations, while blue  $r$  values indicate negative correlations.**

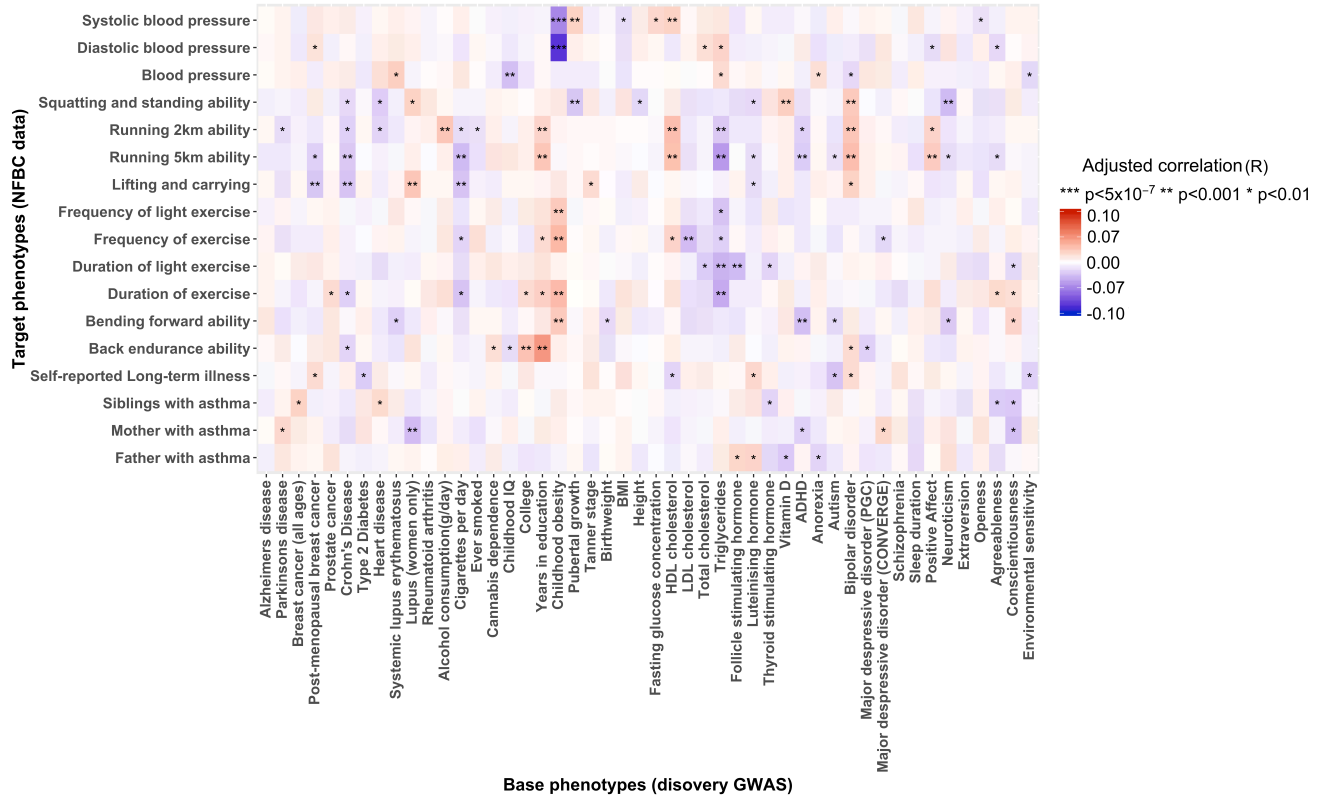

**S6 Fig. Heat map showing genetic associations between polygenic risk scores of GWAS traits (X-axis) and NFB1966 traits (Y-axis) on self-reports on exercise measures and self and clinical reports on health-related measures, controlled for sex, BMI and SES. Asterisks denote different levels of evidence according to  $P$ -value: \*\*\* =  $P < 5 \times 10^{-7}$ , \*\* =  $P < 0.001$ , \* =  $P < 0.01$ . Red  $r$  values indicate positive correlations, while blue  $r$  values indicate negative correlations.**

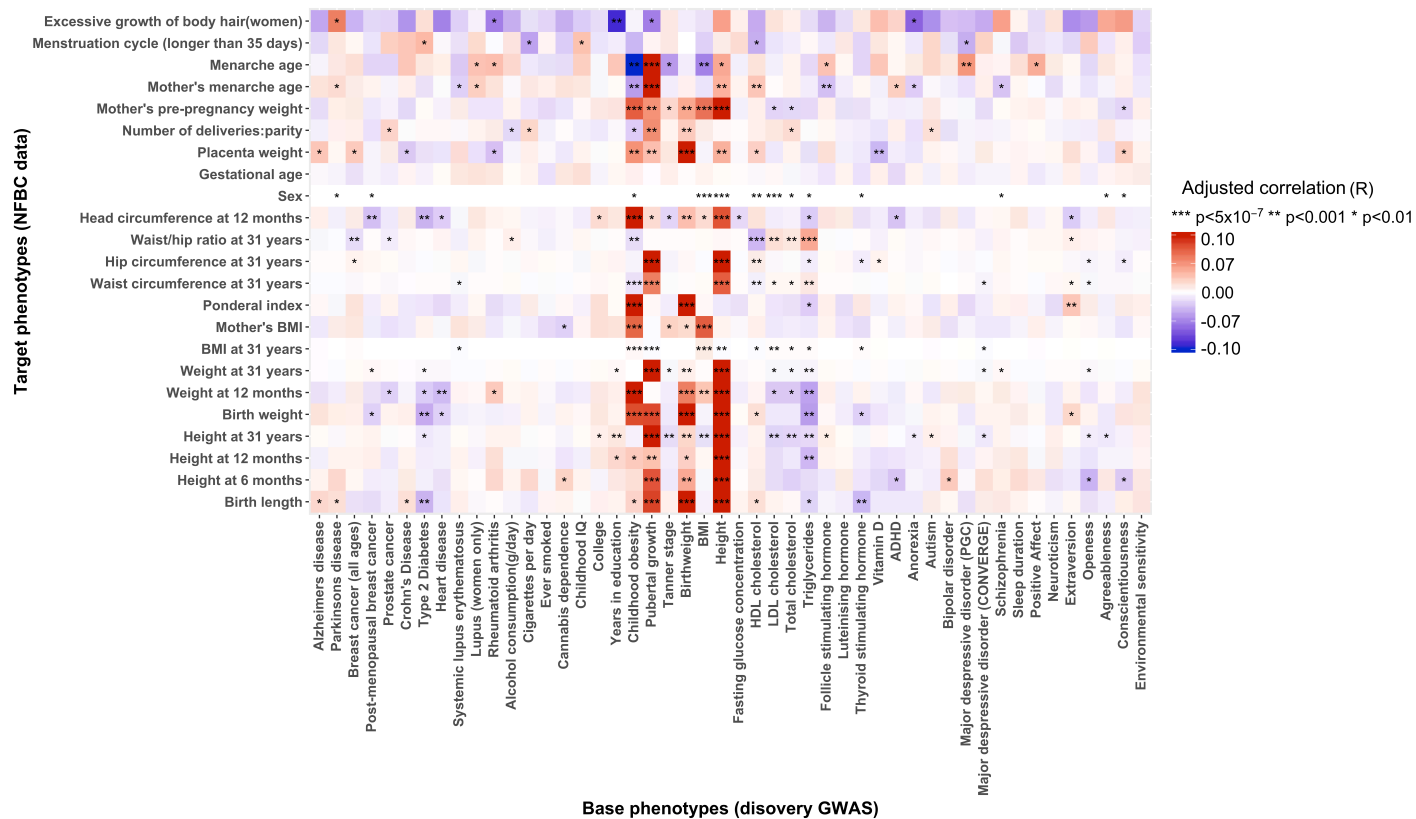

**S7 Fig. Heat map showing genetic associations between polygenic risk scores of GWAS traits (X-axis) and NFBC1966 traits (Y-axis) on clinically measured anthropometric and physiological traits, controlled for sex, BMI and SES. Asterisks denote different levels of evidence according to  $P$ -value: \*\*\* =  $P < 5 \times 10^{-7}$ , \*\* =  $P < 0.001$ , \* =  $P < 0.01$ . Red  $r$  values indicate positive correlations, while blue  $r$  values indicate negative correlations.**

**S1 Table. GWAS used to generate PRS, including source, sample size and overlap information.** \* indicates summary statistics meta-analysis conducted without NFBC1966 by authors of study. † indicates summary statistics corrected with mathematical correction.

| Trait                        | Sample                         | Study                      | Sample size                                          | Overlap with NFBC1966 |
|------------------------------|--------------------------------|----------------------------|------------------------------------------------------|-----------------------|
| Alzheimer's disease          | IGAP                           | Lambert et al, 2013 [54]   | 17,008 Alzheimer's disease cases and 37,154 controls | No                    |
| Parkinson's disease          | IPDGC                          | Plagnol et al, 2011 [55]   | 11,402                                               | No                    |
| Breast Cancer                | NHLBI's Framingham Heart Study | Murabito et al, 2007 [56]  | 1335                                                 | No                    |
| Post-menopause breast cancer | Nurses' Health Study (NHS)     | Hunter et al, 2007 [57]    | 1,145 breast cancer patients and 1,142 controls      | No                    |
| Prostate Cancer              | NHLBI's Framingham Heart Study | Murabito et al, 2007 [56]  | 1335                                                 | No                    |
| Crohn's disease              | IBD                            | Jostins et al, 2012 [58]   | 75,000                                               | No                    |
| Diabetes                     | DIAGRAM                        | Morris et al, 2012 [59]    | 12,171 Type II diabetes cases and 56,862 controls    | No                    |
| Heart disease                | CARDIoGRAM                     | Schunkert et al, 2011 [60] | 22,233 cases and 64,762 controls                     | No                    |

|                      |                                             |                                            |                                   |      |
|----------------------|---------------------------------------------|--------------------------------------------|-----------------------------------|------|
| Lupus                | Autoimmune Biomarkers Collaborative Network | Hom et al, 2008 [61]                       | 1311 case and 3340 controls       | No   |
| Lupus (women only)   | SLEGEN                                      | Ramos et al, 2011 [62]                     | 706 female cases and 353 controls | No   |
| Rheumatoid arthritis | RA                                          | Chen et al, 2011 [63]                      | 5500 cases and 20,000 controls    | No   |
| Alcohol              | AlcGen, CHARGE+                             | Schumann et al, 2016 [64]                  | 105,000                           | No   |
| Cigarettes per day   | TAG                                         | Tobacco and genetics consortium, 2010 [65] | 74,053                            | No   |
| Ever smoked          | TAG                                         | Tobacco and genetics consortium, 2010 [65] | 74,053                            | No   |
| Cannabis             | TwinsUK                                     | Verweij et al, 2013 [66]                   | 10,091                            | No   |
| Childhood IQ         | SSGAC                                       | Rietveld et al, 2014 [67]                  | 24,189                            | No   |
| College (yes or no)  | SSGAC                                       | Rietveld et al, 2013 [68]                  | 126,559                           | Yes* |
| Years in education   | SSGAC                                       | Rietveld et al, 2013 [68]                  | 126,559                           | Yes* |
| Childhood obesity    | EGG                                         | Bradfield et al, 2012 [69]                 | 5,530 cases and 8,318 controls    | Yes* |

|                              |                          |                              |         |      |
|------------------------------|--------------------------|------------------------------|---------|------|
| Birth weight                 | EGG                      | Horikoshi et al, 2013 [70]   | 26,836  | Yes† |
| Tanner stage                 | EGG                      | Cousminer et al, 2014 [71]   | 9,916   | No   |
| Pubertal growth              | EGG                      | Cousminer et al, 2013 [72]   | 10,799  | No   |
| Body mass index (BMI)        | GIANT                    | Locke et al, 2015 [73]       | 339,224 | Yes* |
| Height                       | GIANT                    | Lango Allen et al, 2010 [74] | 183,727 | Yes† |
| Fasting Glucose              | MAGIC                    | Manning et al, 2012 [75]     | 58,074  | No   |
| HDL cholesterol              | Global lipids consortium | Willer et al, 2013 [76]      | 188,577 | Yes* |
| LDL cholesterol              | Global lipids consortium | Willer et al, 2013 [76]      | 188,577 | Yes* |
| Total cholesterol            | Global lipids consortium | Willer et al, 2013 [76]      | 188,577 | Yes* |
| Triglycerides                | Global lipids consortium | Willer et al, 2013 [76]      | 188,577 | Yes* |
| Follicle stimulating hormone | Framingham cohort        | Hwang et al, 2007 [77]       | 537     | No   |
| Luteinising hormone          | Framingham cohort        | Hwang et al, 2007 [77]       | 537     | No   |

|                                      |                              |                           |                                                                       |    |
|--------------------------------------|------------------------------|---------------------------|-----------------------------------------------------------------------|----|
| Thyroid stimulating hormone          | Framingham cohort            | Hwang et al, 2007 [77]    | 833                                                                   | No |
| Vitamin D                            | 15 cohorts                   | Wang et al, 2010 [78]     | 33,996                                                                | No |
| ADHD                                 | CHOP, IMAGE, IMAGE II, PUWMA | Neale et al, 2010 [79]    | 2,064 trios, 896 cases, and 2,455 controls                            | No |
| Anorexia nervosa                     | GCAN                         | Boraska et al, 2014 [80]  | 5,551 cases and 21,080 controls                                       | No |
| Autism spectrum disorder             | PGC                          | Smoller et al, 2013 [81]  | 4,788 trio cases, 4,788 trio pseudo-controls, 161 cases, 526 controls | No |
| Bipolar disorder                     | PGC                          | Sklar et al, 2011 [82]    | 7,481 cases and 9,250 controls                                        | No |
| Major depressive disorder (PGC)      | PGC                          | Ripke et al, 2013 [83]    | 9,240 cases and 9,519 controls                                        | No |
| Major depressive disorder (CONVERGE) | CONVERGE                     | Cai et al, 2015 [84]      | 5,303 cases and 5,337 controls                                        | No |
| Schizophrenia                        | PGC                          | Ripke et al, 2013 [85]    | 36,989 cases and 113,075 controls                                     | No |
| Positive affect                      | Study specific               | Hart et al, 2012 [86]     | 381                                                                   | No |
| Sleep duration                       | Framingham cohort            | Gottlieb et al, 2007 [87] | 774                                                                   | No |

|                              |      |                             |        |    |
|------------------------------|------|-----------------------------|--------|----|
| Neuroticism                  | GPC  | De Moor et al,<br>2012 [88] | 20,669 | No |
| Extraversion                 | GPC  | De Moor et al,<br>2012 [88] | 20,669 | No |
| Openness                     | GPC  | De Moor et al,<br>2012 [88] | 20,669 | No |
| Agreeableness                | GPC  | De Moor et al,<br>2012 [88] | 20,669 | No |
| Conscientiousness            | GPC  | De Moor et al,<br>2012 [88] | 20,669 | No |
| Environmental<br>sensitivity | TEDS | Keers et al,<br>2016 [89]   | 1026   | No |



**S2 Table. Summary of sex stratified results for significant ( $P<0.05$ ) interactions between most predictive PRS and sex on NFBC1966 phenotypes. M = male; F = female**

| Sex stratified PRS analysis   |                   |                   |       |       | Interaction term   |       |          |
|-------------------------------|-------------------|-------------------|-------|-------|--------------------|-------|----------|
|                               | M PRS ( $\beta$ ) | F PRS ( $\beta$ ) | M SE  | F SE  | Effect ( $\beta$ ) | SE    | P-value  |
| HDL predicting SHBG           | 0.11              | 0.25              | 0.017 | 0.028 | 0.13               | 0.030 | 8.13e-06 |
| HDL predicting BMI            | -0.15             | -0.24             | 0.021 | 0.02  | -0.09              | 0.03  | 0.0036   |
| BMI predicting CRP            | 0.17              | 0.25              | 0.02  | 0.03  | 0.09               | 0.04  | 0.0147   |
| Breast cancer predicting SHBG | -0.0085           | -0.081            | 0.016 | 0.030 | -0.074             | 0.031 | 0.0171   |
| Cigarettes predicting running | 0.021             | 0.086             | 0.019 | 0.021 | 0.065              | 0.029 | 0.0258   |
| BMI predicting HDL            | -0.13             | -0.21             | 0.022 | 0.028 | -0.077             | 0.035 | 0.027    |

**S3 Table. Target NFBC1966 phenotypes tested for associations with GWAS base traits.** Data collected at age 31 unless stated otherwise.

|                           | <b>Trait</b>                               | <b>Form Question</b>                                                                                      | <b>Form answer</b>                                                                                      |
|---------------------------|--------------------------------------------|-----------------------------------------------------------------------------------------------------------|---------------------------------------------------------------------------------------------------------|
| <b>Medical conditions</b> | Asthma own estimate                        | <b>Have you ever had the following symptoms or conditions associated with the airways and/or allergy?</b> | <b>Your own estimate:</b><br>Never=1; Yes, during the last 12 months=2; Yes, but more than a year ago=3 |
|                           | Asthma verified by a doctor                | <b>Have you ever had the following symptoms or conditions associated with the airways and/or allergy?</b> | <b>Verified or treated by a doctor:</b> No=1; Yes=2                                                     |
|                           | Cough own estimate                         | <b>Have you ever had the following symptoms or conditions associated with the airways and/or allergy?</b> | <b>Your own estimate:</b><br>Never=1; Yes, during the last 12 months=2; Yes, but more than a year ago=3 |
|                           | Cough verified by a doctor                 | <b>Have you ever had the following symptoms or conditions associated with the airways and/or allergy?</b> | <b>Verified or treated by a doctor:</b> No=1; Yes=2                                                     |
|                           | Respiratory infection own estimate         | <b>Have you ever had the following symptoms or conditions associated with the airways and/or allergy?</b> | <b>Your own estimate:</b><br>Never=1; Yes, during the last 12 months=2; Yes, but more than a year ago=3 |
|                           | Respiratory infection verified by a doctor | <b>Have you ever had the following symptoms or conditions associated with the airways and/or allergy?</b> | <b>Verified or treated by a doctor:</b> No=1; Yes=2                                                     |
|                           | Emphysema own estimate                     | <b>Have you ever had the following symptoms or conditions associated with the</b>                         | <b>Your own estimate:</b><br>Never=1; Yes, during the last 12 months=2; Yes, but                        |

|  |                                            |                                                                                                           |                                                                                                      |
|--|--------------------------------------------|-----------------------------------------------------------------------------------------------------------|------------------------------------------------------------------------------------------------------|
|  |                                            | <b>airways and/or allergy?</b>                                                                            | more than a year ago=3                                                                               |
|  | Emphysema verified by a doctor             | <b>Have you ever had the following symptoms or conditions associated with the airways and/or allergy?</b> | <b>Verified or treated by a doctor:</b> No=1; Yes=2                                                  |
|  | Hayfever own estimate                      | <b>Have you ever had the following symptoms or conditions associated with the airways and/or allergy?</b> | <b>Your own estimate:</b> Never=1; Yes, during the last 12 months=2; Yes, but more than a year ago=3 |
|  | Hayfever verified by a doctor              | <b>Have you ever had the following symptoms or conditions associated with the airways and/or allergy?</b> | <b>Verified or treated by a doctor:</b> No=1; Yes=2                                                  |
|  | Eczema own estimate                        | <b>Have you ever had the following symptoms or conditions associated with the airways and/or allergy?</b> | <b>Your own estimate:</b> Never=1; Yes, during the last 12 months=2; Yes, but more than a year ago=3 |
|  | Eczema verified by a doctor                | <b>Have you ever had the following symptoms or conditions associated with the airways and/or allergy?</b> | <b>Verified or treated by a doctor:</b> No=1; Yes=2                                                  |
|  | Allergic eye symptoms own estimate         | <b>Have you ever had the following symptoms or conditions associated with the airways and/or allergy?</b> | <b>Your own estimate:</b> Never=1; Yes, during the last 12 months=2; Yes, but more than a year ago=3 |
|  | Allergic eye symptoms verified by a doctor | <b>Have you ever had the following symptoms or conditions associated with the airways and/or allergy?</b> | <b>Verified or treated by a doctor:</b> No=1; Yes=2                                                  |

|  |                          |                                                                                                                 |             |
|--|--------------------------|-----------------------------------------------------------------------------------------------------------------|-------------|
|  | Congenital heart disease | <b>Have you ever had any of the following symptoms, sicknesses or injuries verified or treated by a doctor?</b> | No=1; Yes=2 |
|  | Cardiac insufficiency    | <b>Have you ever had any of the following symptoms, sicknesses or injuries verified or treated by a doctor?</b> | No=1; Yes=2 |
|  | Angina pectoris          | <b>Have you ever had any of the following symptoms, sicknesses or injuries verified or treated by a doctor?</b> | No=1; Yes=2 |
|  | Diabetes                 | <b>Have you ever had any of the following symptoms, sicknesses or injuries verified or treated by a doctor?</b> | No=1; Yes=2 |
|  | Thyroiditis              | <b>Have you ever had any of the following symptoms, sicknesses or injuries verified or treated by a doctor?</b> | No=1; Yes=2 |
|  | Gastric ulcer            | <b>Have you ever had any of the following symptoms, sicknesses or injuries verified or treated by a doctor?</b> | No=1; Yes=2 |
|  | Gallstones               | <b>Have you ever had any of the following symptoms, sicknesses or injuries verified or treated by a doctor?</b> | No=1; Yes=2 |
|  | Urinary tract infection  | <b>Have you ever had any of the following symptoms, sicknesses or injuries verified or treated by a doctor?</b> | No=1; Yes=2 |

|  |                         |                                                                                                                 |             |
|--|-------------------------|-----------------------------------------------------------------------------------------------------------------|-------------|
|  | Ovaritis                | <b>Have you ever had any of the following symptoms, sicknesses or injuries verified or treated by a doctor?</b> | No=1; Yes=2 |
|  | Prostatitis             | <b>Have you ever had any of the following symptoms, sicknesses or injuries verified or treated by a doctor?</b> | No=1; Yes=2 |
|  | Chlamydia               | <b>Have you ever had any of the following symptoms, sicknesses or injuries verified or treated by a doctor?</b> | No=1; Yes=2 |
|  | Genital warts           | <b>Have you ever had any of the following symptoms, sicknesses or injuries verified or treated by a doctor?</b> | No=1; Yes=2 |
|  | Genital herpes          | <b>Have you ever had any of the following symptoms, sicknesses or injuries verified or treated by a doctor?</b> | No=1; Yes=2 |
|  | Genital infection       | <b>Have you ever had any of the following symptoms, sicknesses or injuries verified or treated by a doctor?</b> | No=1; Yes=2 |
|  | Hearing defect          | <b>Have you ever had any of the following symptoms, sicknesses or injuries verified or treated by a doctor?</b> | No=1; Yes=2 |
|  | Ophthalmological defect | <b>Have you ever had any of the following symptoms, sicknesses or injuries verified or treated by a doctor?</b> | No=1; Yes=2 |

|  |                             |                                                                                                                 |             |
|--|-----------------------------|-----------------------------------------------------------------------------------------------------------------|-------------|
|  | Epilepsy                    | <b>Have you ever had any of the following symptoms, sicknesses or injuries verified or treated by a doctor?</b> | No=1; Yes=2 |
|  | Migraine                    | <b>Have you ever had any of the following symptoms, sicknesses or injuries verified or treated by a doctor?</b> | No=1; Yes=2 |
|  | Other neurological disease  | <b>Have you ever had any of the following symptoms, sicknesses or injuries verified or treated by a doctor?</b> | No=1; Yes=2 |
|  | Rheumatoid arthritis        | <b>Have you ever had any of the following symptoms, sicknesses or injuries verified or treated by a doctor?</b> | No=1; Yes=2 |
|  | Other arthritic condition   | <b>Have you ever had any of the following symptoms, sicknesses or injuries verified or treated by a doctor?</b> | No=1; Yes=2 |
|  | Degenerative back condition | <b>Have you ever had any of the following symptoms, sicknesses or injuries verified or treated by a doctor?</b> | No=1; Yes=2 |
|  | Cancer                      | <b>Have you ever had any of the following symptoms, sicknesses or injuries verified or treated by a doctor?</b> | No=1; Yes=2 |
|  | Hernia                      | <b>Have you ever had any of the following symptoms, sicknesses or injuries verified or treated by a doctor?</b> | No=1; Yes=2 |

|  |                                            |                                                                                                                 |             |
|--|--------------------------------------------|-----------------------------------------------------------------------------------------------------------------|-------------|
|  | Anaemia                                    | <b>Have you ever had any of the following symptoms, sicknesses or injuries verified or treated by a doctor?</b> | No=1; Yes=2 |
|  | Psychosis                                  | <b>Have you ever had any of the following symptoms, sicknesses or injuries verified or treated by a doctor?</b> | No=1; Yes=2 |
|  | Depression                                 | <b>Have you ever had any of the following symptoms, sicknesses or injuries verified or treated by a doctor?</b> | No=1; Yes=2 |
|  | Other mental health problem                | <b>Have you ever had any of the following symptoms, sicknesses or injuries verified or treated by a doctor?</b> | No=1; Yes=2 |
|  | Problems with alcohol                      | <b>Have you ever had any of the following symptoms, sicknesses or injuries verified or treated by a doctor?</b> | No=1; Yes=2 |
|  | Other intoxicant problem                   | <b>Have you ever had any of the following symptoms, sicknesses or injuries verified or treated by a doctor?</b> | No=1; Yes=2 |
|  | Fractures                                  | <b>Have you ever had any of the following symptoms, sicknesses or injuries verified or treated by a doctor?</b> | No=1; Yes=2 |
|  | Dental malocclusion requiring orthodontics | <b>Have you ever had any of the following symptoms, sicknesses or injuries verified or treated by a doctor?</b> | No=1; Yes=2 |

|                  |                                  |                                                                                                                 |             |
|------------------|----------------------------------|-----------------------------------------------------------------------------------------------------------------|-------------|
|                  | Other sickness or injury         | <b>Have you ever had any of the following symptoms, sicknesses or injuries verified or treated by a doctor?</b> | No=1; Yes=2 |
|                  | Medication for asthma            | <b>Have you ever had any of the following symptoms, sicknesses or injuries verified or treated by a doctor?</b> | No=1; Yes=2 |
| <b>Metabolic</b> | Apolipoprotein A-I               | <b>N/A - measures from blood samples</b>                                                                        | N/A         |
|                  | Apolipoprotein B                 | <b>N/A - measures from blood samples</b>                                                                        | N/A         |
|                  | ApoB/apoA1 ratio                 | <b>N/A - measures from blood samples</b>                                                                        | N/A         |
|                  | Intermediate-density lipoprotein | <b>N/A - measures from blood samples</b>                                                                        | N/A         |
|                  | Low-density lipoprotein          | <b>N/A - measures from blood samples</b>                                                                        | N/A         |
|                  | High-density lipoprotein         | <b>N/A - measures from blood samples</b>                                                                        | N/A         |
|                  | Total cholesterol                | <b>N/A - measures from blood samples</b>                                                                        | N/A         |
|                  | Triglycerides                    | <b>N/A - measures from blood samples</b>                                                                        | N/A         |
|                  | Very-low-density lipoprotein     | <b>N/A - measures from blood samples</b>                                                                        | N/A         |
|                  | Total cholesterol/HDL ratio      | <b>N/A - measures from blood samples</b>                                                                        | N/A         |
|                  | non-HDL cholesterol              | <b>N/A - measures from blood samples</b>                                                                        | N/A         |
|                  | Fasting glucose concentration    | <b>N/A - measures from blood samples</b>                                                                        | N/A         |
|                  | Fasting insulin concentration    | <b>N/A - measures from blood samples</b>                                                                        | N/A         |
|                  | Testosterone                     | <b>N/A - measures from blood samples</b>                                                                        | N/A         |
|                  | Sex hormone binding globulin     | <b>N/A - measures from blood samples</b>                                                                        | N/A         |
|                  | Luteinising hormone              | <b>N/A - measures from blood samples</b>                                                                        | N/A         |
|                  | C-reactive protein               | <b>N/A - measures from blood samples</b>                                                                        | N/A         |
|                  | Heart rate                       | <b>N/A - clinical measure</b>                                                                                   | N/A         |



|                         |                          |                                                                            |                                                                                                                                                                                                                                  |
|-------------------------|--------------------------|----------------------------------------------------------------------------|----------------------------------------------------------------------------------------------------------------------------------------------------------------------------------------------------------------------------------|
|                         | HOMA-beta                | <b>N/A - measures from blood samples</b>                                   | N/A                                                                                                                                                                                                                              |
| <b>Lifestyle traits</b> | Alcohol consumed per day | <b>Alcohol consumed per day</b>                                            | ... g/day                                                                                                                                                                                                                        |
|                         | Alcoholic beverages      | <b>Do you drink even occasionally alcoholic beverages?</b>                 | 1 I have never used alcohol, move to question 79<br>2 no, because I gave up alcohol completely _ years ago, move to question 79<br>3 yes, less often than once a month<br>4 yes, at least once a month                           |
|                         | Drunkenness age 14       | <b>Have you been drunk?</b>                                                | 1 never<br>2 once slightly<br>3 twice or more times slightly once very much<br>4 2-4 times very much<br>5 several times very much                                                                                                |
|                         | Alcohol consumed         | <b>N/A</b>                                                                 | N/A                                                                                                                                                                                                                              |
|                         | Beer/cider frequency     | <b>How often do you usually drink beer, cider or long drinks?</b>          | 1 never<br>2 once a year or less often<br>3 a couple of times a year<br>4 3-4 times a year<br>5 once in a couple of months<br>6 once a month<br>7 a couple of times a month<br>8 once a week<br>9 a few times a week<br>10 daily |
|                         | Beer/cider amount        | <b>How much do you usually drink beer, cider or long drinks at a time?</b> | 1 less than one bottle<br>2 1 bottle<br>3 2 bottles<br>4 3 bottles<br>5 4-5 bottles<br>6 6-9 bottles<br>7 10-14 bottles<br>8 15 bottles or more                                                                                  |

|  |                      |                                                                                 |                                                                                                                                                                                                                                                                        |
|--|----------------------|---------------------------------------------------------------------------------|------------------------------------------------------------------------------------------------------------------------------------------------------------------------------------------------------------------------------------------------------------------------|
|  |                      |                                                                                 | 9 I don't drink these drinks                                                                                                                                                                                                                                           |
|  | Light wine frequency | <b>How often do you usually drink light wine?</b>                               | 1 never<br>2 once a year or less often<br>3 a couple of times a year<br>4 3-4 times a year<br>5 once in a couple of months<br>6 once a month<br>7 a couple of times a month<br>8 once a week<br>9 a few times a week<br>10 daily                                       |
|  | Light wine amount    | <b>How much do you usually drink light wine (alcohol content 5%) at a time?</b> | 1 half a glass<br>2 a glass (= 16 cl)<br>3 a couple of glasses<br>4 about half a big bottle (big bottle = 3/4 l)<br>5 slightly less than a big bottle<br>6 about a big bottle<br>7 one to two big bottles<br>8 more than two big bottles<br>9 I don't drink light wine |
|  | Wine frequency       | <b>How often do you usually drink wine?</b>                                     | 1 never<br>2 once a year or less often<br>3 a couple of times a year<br>4 3-4 times a year<br>5 once in a couple of months<br>6 once a month<br>7 a couple of times a month<br>8 once a week<br>9 a few times a week<br>10 daily                                       |

|  |                   |                                                         |                                                                                                                                                                                                                                                                                                                                               |
|--|-------------------|---------------------------------------------------------|-----------------------------------------------------------------------------------------------------------------------------------------------------------------------------------------------------------------------------------------------------------------------------------------------------------------------------------------------|
|  | Wine amount       | <b>How much do you usually drink wine at a time?</b>    | 1 half a glass<br>2 a glass (= 16 cl)<br>3 a couple of glasses<br>4 about half a big bottle (big bottle = 3/4 l)<br>5 slightly less than a big bottle<br>6 about a big bottle<br>7 one to two big bottles<br>8 more than two big bottles<br>9 I don't drink wine                                                                              |
|  | Spirits frequency | <b>How often do you usually drink spirits?</b>          | 1 never<br>2 once a year or less often<br>3 a couple of times a year<br>4 3-4 times a year<br>5 once in a couple of months<br>6 once a month<br>7 a couple of times a month<br>8 once a week<br>9 a few times a week<br>10 daily                                                                                                              |
|  | Spirits amount    | <b>How much do you usually drink spirits at a time?</b> | 1 less than one drink as served in a restaurant (less than 4 cl)<br>2 one drink as served in a restaurant (appr. 4 cl)<br>3 a couple of restaurant drinks<br>4 3-4 restaurant drinks<br>5 5-6 restaurant drinks<br>6 7-10 restaurant drinks<br>7 a bottle of about half a litre<br>8 more than a half-litre bottle<br>9 I don't drink spirits |

|  |                               |                                                                                                   |                                                                                                                                                                                                                                  |
|--|-------------------------------|---------------------------------------------------------------------------------------------------|----------------------------------------------------------------------------------------------------------------------------------------------------------------------------------------------------------------------------------|
|  | Teetotal                      | <b>Do you drink even occasionally alcoholic beverages?</b>                                        | 1 I have never used alcohol,<br>move to question 79<br>2 no, because I gave up alcohol completely<br>I I I years ago, move to question 79<br>3 yes, less often than once a month<br>4 yes, at least once a month                 |
|  | Age started smoking           | <b>Have you ever smoked in your life: yes, I started when I was X years old</b>                   | X                                                                                                                                                                                                                                |
|  | Age started smoking regularly | <b>Have you ever been smoking regularly?: yes, I have smoked regularly for altogether X years</b> | X                                                                                                                                                                                                                                |
|  | Smoking regularly             | <b>Have you ever been smoking regularly?</b>                                                      | 1 no<br>2 yes, I have smoked regularly for altogether I__I__ I years                                                                                                                                                             |
|  | Smoking nowadays              | <b>Do you smoke nowadays?</b>                                                                     | 1 on 7 days a week<br>2 on 5-6 days a week<br>3 on 2-4 days a week<br>4 on one day a week<br>5 occasionally<br>6 not at all                                                                                                      |
|  | Last smoked                   | <b>When did you last smoke?</b>                                                                   | 1 Yesterday or today<br>2 2 days - 1 month ago<br>3 1 - 6 months ago<br>4 7 - 11 months ago<br>5 1 - 5 years ago, move to question 86<br>6 6 - 10 years ago, move to question 8<br>7 More than 10 years ago, move to question 86 |
|  | Smoking age 14                | <b>Smoking</b>                                                                                    | 1 I have never tried<br>2 I tried once<br>3 I have tried twice or more<br>4 I smoke                                                                                                                                              |

|  |                                               |                                                                                                                                   |                                                                                                                                                                  |
|--|-----------------------------------------------|-----------------------------------------------------------------------------------------------------------------------------------|------------------------------------------------------------------------------------------------------------------------------------------------------------------|
|  |                                               |                                                                                                                                   | occasionally<br>5 I smoke about twice a week<br>6 I smoke 1 — 5 cigarettes daily<br>7 I smoke 6 — 10 cigarettes daily<br>8 I smoke more than 10 cigarettes daily |
|  | Smoking age 31                                | <b>Do you smoke nowadays?</b>                                                                                                     | 1 No 2 Yes                                                                                                                                                       |
|  | Change in smoking habits during pregnancy     | <b>Did the mother change her smoking habits during this pregnancy?</b>                                                            | 1 No 2 Yes                                                                                                                                                       |
|  | Cigarettes after the change                   | <b>Number of cigarettes or pipefuls smoked daily after the change</b>                                                             | —                                                                                                                                                                |
|  | How much smoking during pregnancy             | <b>During the 12 months preceding the pregnancy, did the mother smoke at least one cigarette or one pipeful of tobacco a day?</b> | If "yes", how many cigarettes/pipefuls a day? __cigarettes pipefuls                                                                                              |
|  | Filter cigarettes per day                     | <b>How much per day do you usually smoke now or smoked before you gave up smoking?</b>                                            | filter cigarettes cigarettes per day<br><br>other cigarettes__cigarettes per day<br><br>pipefuls __pipefuls per day<br><br>cigars__cigars per day                |
|  | Mother's education                            | <b>Mother's education</b>                                                                                                         | —                                                                                                                                                                |
|  | Social class according to father's occupation | <b>Mother's and father's occupational status</b>                                                                                  | 1 employer, 2 entrepreneur director, 3 employee worker, 4 assisting family member 0 no occupation                                                                |
|  | Social class according to                     | <b>Mother's and father's occupational status</b>                                                                                  | 1 employer, 2 entrepreneur director, 3 employee worker, 4                                                                                                        |

|               |                                               |                                                                                                                                   |                                                                                                    |
|---------------|-----------------------------------------------|-----------------------------------------------------------------------------------------------------------------------------------|----------------------------------------------------------------------------------------------------|
|               | mother's occupation                           |                                                                                                                                   | assisting family member 0 no occupation                                                            |
|               | Socio-economic status according to occupation | <b>What is your present occupation?</b>                                                                                           | —                                                                                                  |
|               | Contraceptive pill                            | <b>Which method of contraception are you using?</b>                                                                               | —                                                                                                  |
|               | Hours in dust and smoke on duty               | <b>How much do you experience the following things in your surroundings?</b>                                                      | 1 2 3 4 Dust, smoke steam etc.                                                                     |
|               | Hours in dust and smoke off duty              | <b>How much do you experience the following things in your surroundings?</b>                                                      | 1 2 3 4 Dust, smoke steam etc.                                                                     |
|               | Second hand smoke                             | <b>How much do you experience the following things in your surroundings?</b>                                                      | 1 2 3 4 Cigarette smoke                                                                            |
|               | Mother's age                                  | <b>Mother's age</b>                                                                                                               | __ years                                                                                           |
|               | Father's age                                  | <b>Father's age</b>                                                                                                               | __ years                                                                                           |
|               | Mother smoking during pregnancy               | <b>During the 12 months preceding the pregnancy, did the mother smoke at least one cigarette or one pipeful of tobacco a day?</b> | 1 No 2 Yes                                                                                         |
| <b>Health</b> | Back endurance ability                        | <b>Back endurance test</b>                                                                                                        | N/A                                                                                                |
|               | Bending forward ability                       | <b>How well are you capable of doing the following things?</b>                                                                    | 1 No problem 2 I can, but it's difficult 3 I can, but it's very difficult 4 I can't at all         |
|               | Duration of exercise                          | <b>How long at a time do you take exercise in your leisure time?</b>                                                              | 1 Never 2 Less than 20 minutes 3 20-39 minutes 4 40-59 minutes 5 1-1,5 hours 6 more than 1,5 hours |
|               | Duration of light exercise                    | <b>How long at a time do you take exercise in your leisure time?</b>                                                              | 1 Never 2 Less than 20 minutes 3 20-39 minutes 4 40-59 minutes 5 1-1,5 hours 6 more than 1,5 hours |

|                      |                                 |                                                                |                                                                                            |
|----------------------|---------------------------------|----------------------------------------------------------------|--------------------------------------------------------------------------------------------|
|                      | Frequency of exercise           | <b>How often in your leisure time do you take exercise ?</b>   | 1 Once a month 2 2-3 a month 3 Once a week 4 2-3 times a week 5 4-6 times a week 6 Daily   |
|                      | Frequency of light exercise     | <b>How often in your leisure time do you take exercise ?</b>   | 1 Once a month 2 2-3 a month 3 Once a week 4 2-3 times a week 5 4-6 times a week 6 Daily   |
|                      | Lifting and carrying            | <b>How well are you capable of doing the following things?</b> | 1 No problem 2 I can, but it's difficult 3 I can, but it's very difficult 4 I can't at all |
|                      | Running 5km ability             | <b>How well are you capable of doing the following things?</b> | 1 No problem 2 I can, but it's difficult 3 I can, but it's very difficult 4 I can't at all |
|                      | Running 2km ability             | <b>How well are you capable of doing the following things?</b> | 1 No problem 2 I can, but it's difficult 3 I can, but it's very difficult 4 I can't at all |
|                      | Squatting and standing ability  | <b>How well are you capable of doing the following things?</b> | 1 No problem 2 I can, but it's difficult 3 I can, but it's very difficult 4 I can't at all |
|                      | Blood pressure                  | <b>N/A - clinical measure</b>                                  | N/A                                                                                        |
|                      | Diastolic blood pressure        | <b>N/A - clinical measure</b>                                  | N/A                                                                                        |
|                      | Systolic blood pressure         | <b>N/A - clinical measure</b>                                  | N/A                                                                                        |
| <b>Physiological</b> | Birth length                    | <b>N/A - clinical measure</b>                                  | N/A                                                                                        |
|                      | Height at 6 months              | <b>N/A - clinical measure</b>                                  | N/A                                                                                        |
|                      | Height at 12 months             | <b>N/A - clinical measure</b>                                  | N/A                                                                                        |
|                      | Height at 31 years              | <b>N/A - clinical measure</b>                                  | N/A                                                                                        |
|                      | Birth weight                    | <b>N/A - clinical measure</b>                                  | N/A                                                                                        |
|                      | Weight at 12 months             | <b>N/A - clinical measure</b>                                  | N/A                                                                                        |
|                      | Weight at 31 years              | <b>N/A - clinical measure</b>                                  | N/A                                                                                        |
|                      | BMI at 31 years                 | <b>N/A - clinical measure</b>                                  | N/A                                                                                        |
|                      | Ponderal index                  | <b>N/A - clinical measure</b>                                  | N/A                                                                                        |
|                      | Waist circumference at 31 years | <b>N/A - clinical measure</b>                                  | N/A                                                                                        |
|                      | Hip circumference at 31 years   | <b>N/A - clinical measure</b>                                  | N/A                                                                                        |

|  |                                          |                                                                                                                                |                                        |
|--|------------------------------------------|--------------------------------------------------------------------------------------------------------------------------------|----------------------------------------|
|  | Waist/hip ratio at 31 years              | <b>N/A - clinical measure</b>                                                                                                  | N/A                                    |
|  | Head circumference at 12 months          | <b>N/A - clinical measure</b>                                                                                                  | N/A                                    |
|  | Sex                                      | <b>N/A - clinical measure</b>                                                                                                  | N/A                                    |
|  | Gestational age                          | <b>N/A - clinical measure</b>                                                                                                  | N/A                                    |
|  | Placenta weight                          | <b>N/A - clinical measure</b>                                                                                                  | N/A                                    |
|  | Number of deliveries:parity              | <b>If you have been pregnant, how many times have you had - miscarriages; abortions; extrauterine pregnancies; deliveries?</b> | __times                                |
|  | Pre-pregnancy weight                     | <b>Mother's weight before pregnancy</b>                                                                                        | __KG                                   |
|  | Mother's menarche age                    | <b>How old were you when you started menstruating?</b>                                                                         | __years                                |
|  | Menarche age                             | <b>How old were you when you started menstruating?</b>                                                                         | __years                                |
|  | Menstruation cycle (longer than 35 days) | <b>Is your menstrual cycle often over 35 days?</b>                                                                             | 1 Yes 2 No 3 I don't have menstruation |
|  | Excessive growth of body hair(women)     | <b>Do you have excessive growth of body hair?</b>                                                                              | 1 Yes 2 No                             |
|  | Mother's BMI                             | <b>N/A - clinical measure</b>                                                                                                  | N/A                                    |
